# Supplementary material
Source: PubMed Central journal article supplement (PMC3057509)

# Supplementary Figure 5 Mandal *et. al.*

**a**

|             |                            | + IL-7 |   |   |   |   | - IL-7 |   |   |   |    | + IL-7 + MEK-i |    |    |    |    | -IL7 + MEK-i |    |    |    |    |    |    |    |    |    |    |    |    |
|-------------|----------------------------|--------|---|---|---|---|--------|---|---|---|----|----------------|----|----|----|----|--------------|----|----|----|----|----|----|----|----|----|----|----|----|
|             |                            | 1      | 2 | 3 | 4 | 5 | 6      | 7 | 8 | 9 | 10 | 11             | 12 | 13 | 14 | 15 | 16           | 17 | 18 | 19 | 20 | 21 | 22 | 23 | 24 | 25 | 26 | 27 | 28 |
| Binding     | Biotinylated probe         | +      | + | - | + | + | +      | + | + | + | -  | +              | +  | +  | +  | +  | +            | -  | +  | +  | +  | +  | +  | +  | -  | +  | +  | +  |    |
|             | Nuclear Extract            | -      | + | + | + | + | +      | + | - | + | +  | +              | +  | +  | +  | -  | +            | +  | +  | +  | +  | +  | -  | +  | +  | +  | +  | +  |    |
| Specificity | Mut-biotinylated probe     | -      | - | + | - | - | -      | - | - | - | +  | -              | -  | -  | -  | -  | -            | +  | -  | -  | -  | -  | -  | -  | +  | -  | -  | -  |    |
|             | Non-specific Antibody      | -      | - | - | + | - | -      | - | - | - | -  | +              | -  | -  | -  | -  | -            | -  | +  | -  | -  | -  | -  | -  | -  | +  | -  | -  |    |
| Competition | E47 Antibody               | -      | - | - | - | + | -      | - | - | - | -  | -              | +  | -  | -  | -  | -            | -  | -  | +  | -  | -  | -  | -  | -  | -  | +  | -  |    |
|             | WT non-biotinylated probe  | -      | - | - | - | - | +      | - | - | - | -  | -              | -  | +  | -  | -  | -            | -  | -  | -  | +  | -  | -  | -  | -  | -  | -  | +  |    |
|             | Mut-non-biotinylated probe | -      | - | - | - | - | +      | - | - | - | -  | -              | -  | +  | -  | -  | -            | -  | -  | -  | +  | -  | -  | -  | -  | -  | +  |    |    |

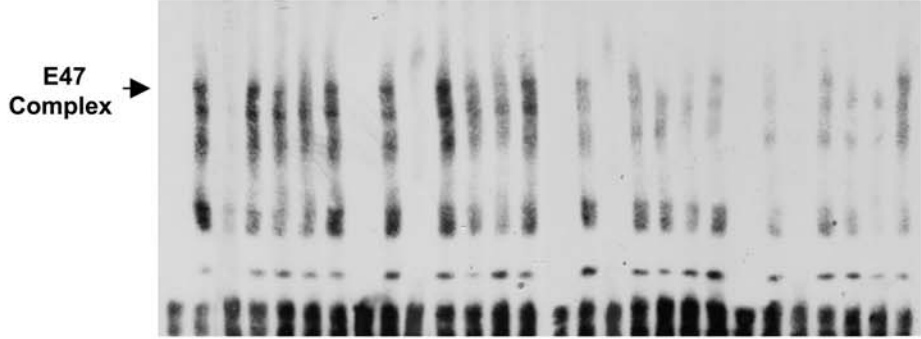

Supplement: NIHMS249116-supplement-SF5.pdf [file NIHMS249116-supplement-SF5.pdf]
