# Supplementary material
Source: PubMed Central journal article supplement (PMC3057509)

# Supplementary Figure 3 Mandal *et. al.*

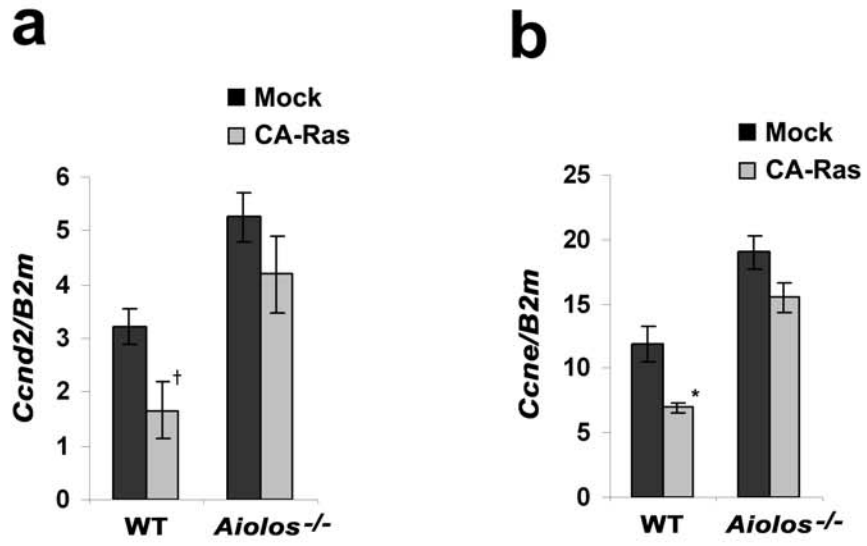

Supplement: NIHMS249116-supplement-SF3.pdf [file NIHMS249116-supplement-SF3.pdf]

# Supplementary Figure 4 *Mandal et. al.*

**a**

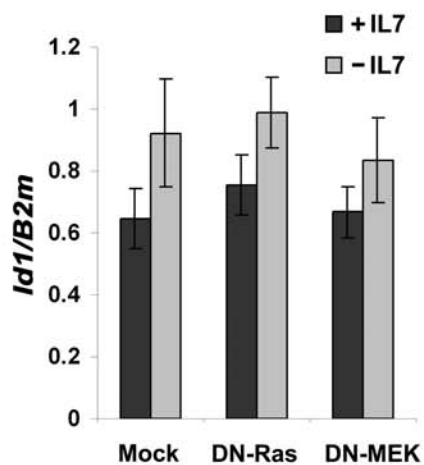

**b**

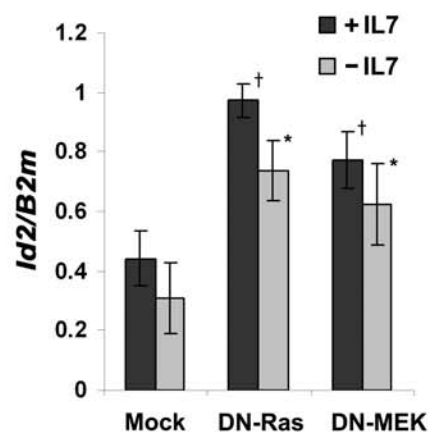

**c**

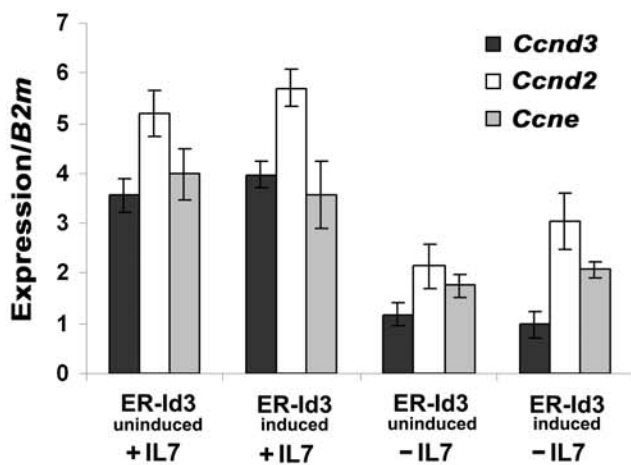

**d**

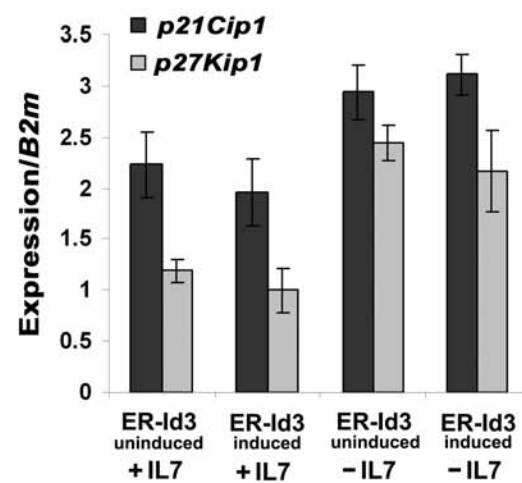

Supplement: NIHMS249116-supplement-SF4.pdf [file NIHMS249116-supplement-SF4.pdf]

# Supplementary Figure 6 *Mandal et. al.*

**a**

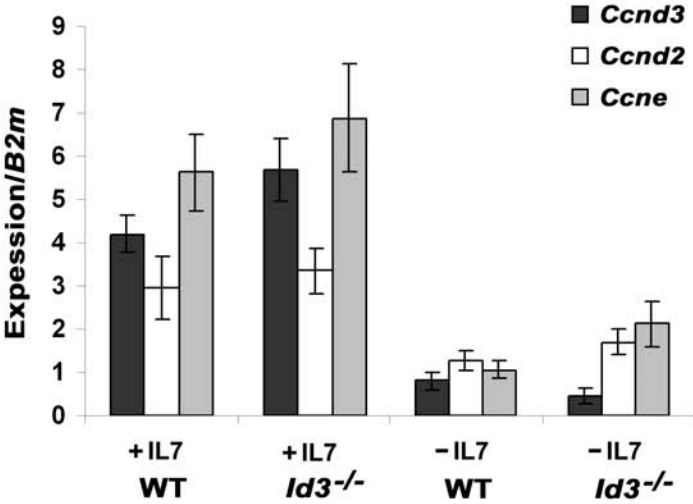

Supplement: NIHMS249116-supplement-SF6.pdf [file NIHMS249116-supplement-SF6.pdf]

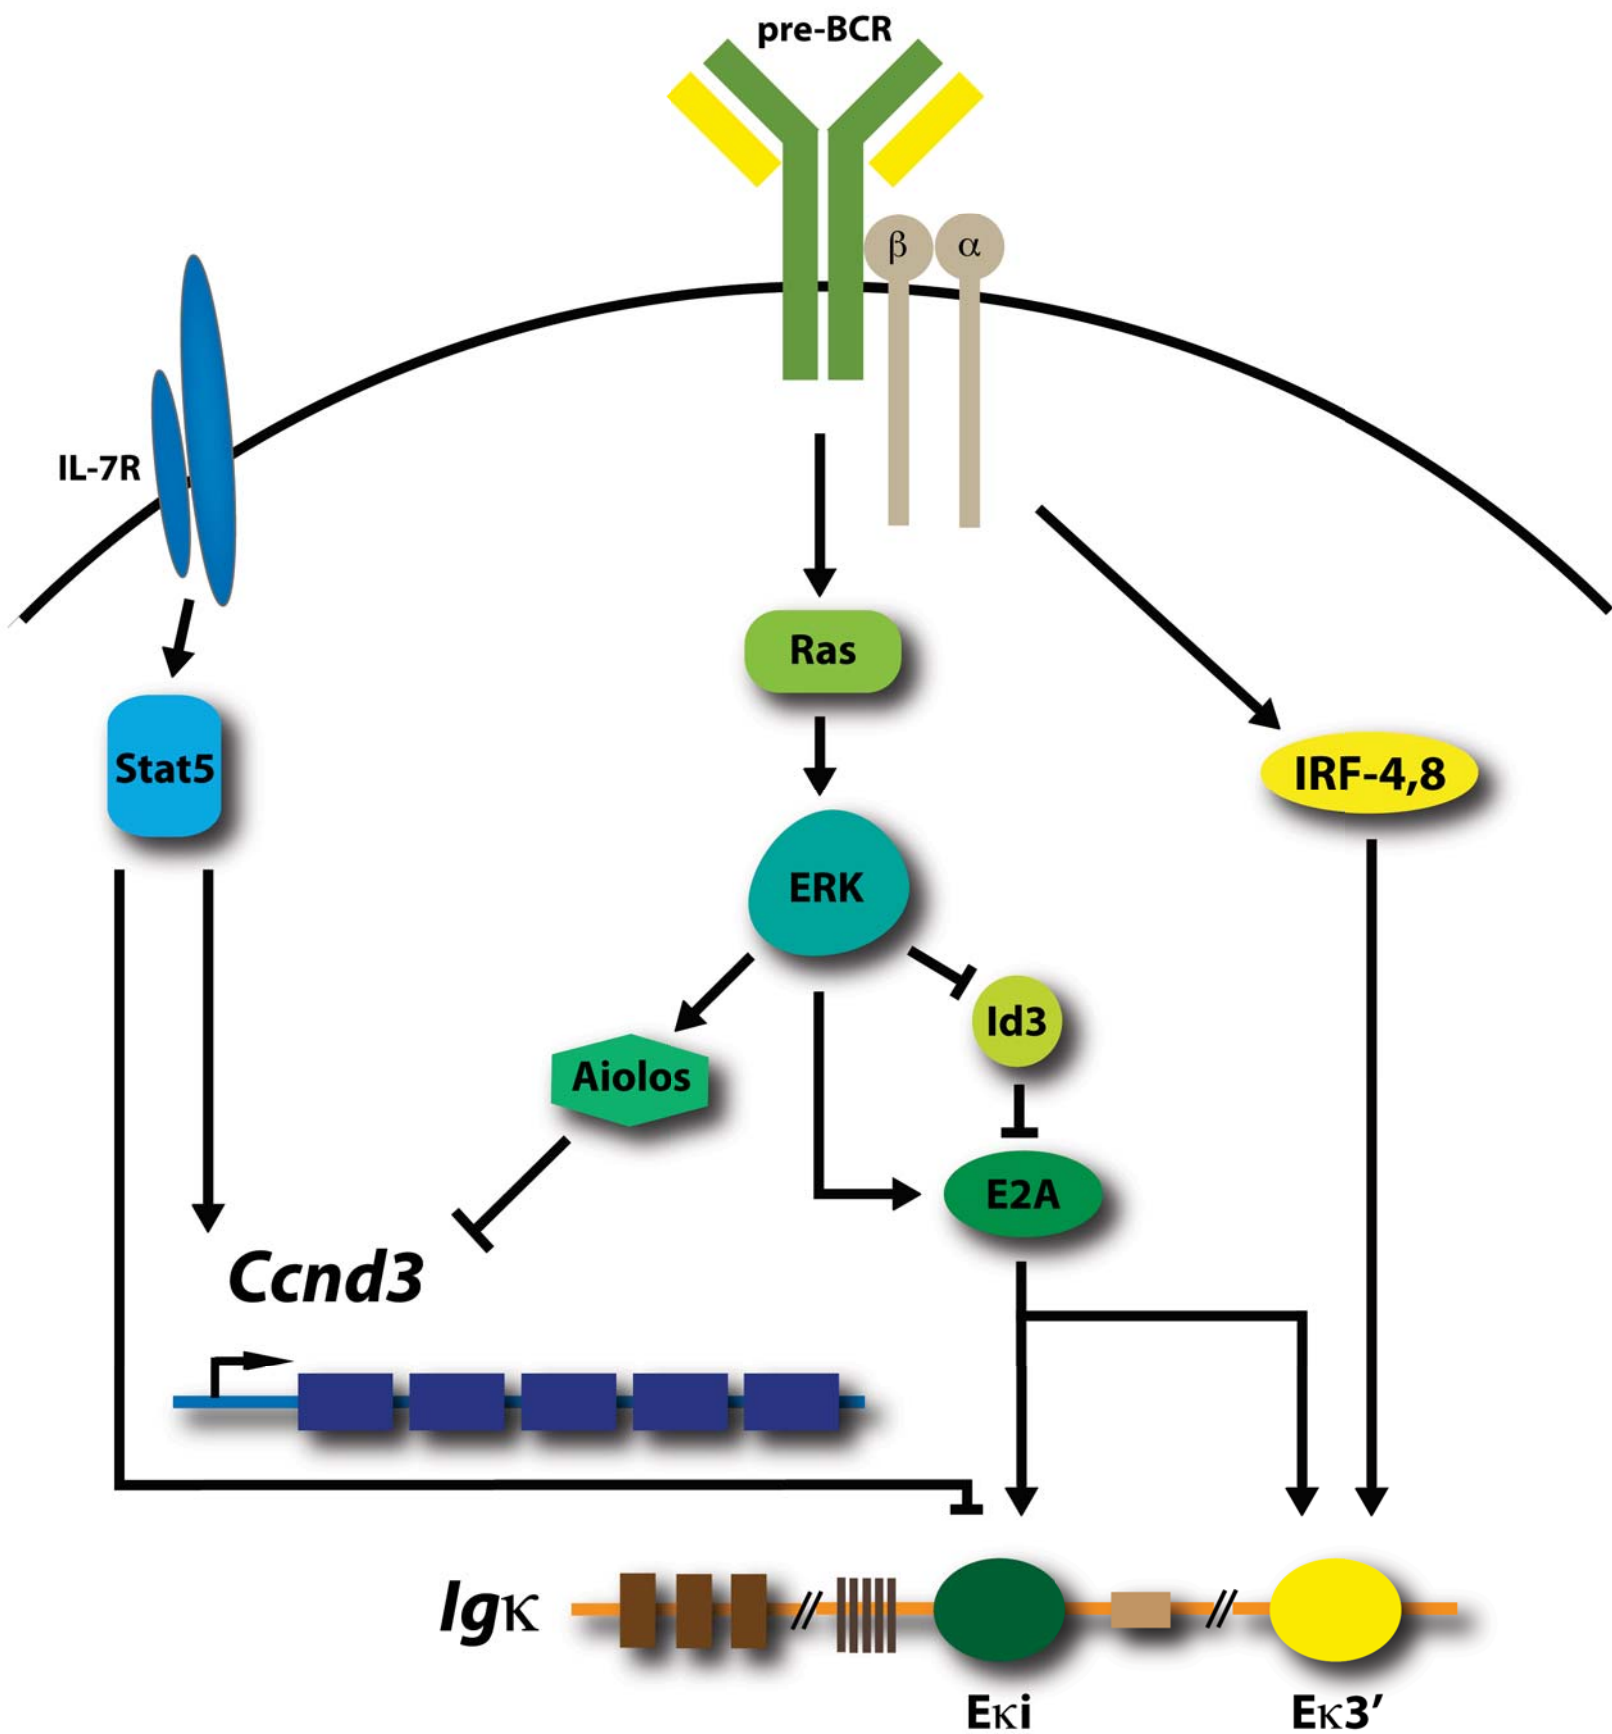

Supplement: NIHMS249116-supplement-SF7.pdf [file NIHMS249116-supplement-SF7.pdf]
